# Supplementary material
Source: PubMed Central journal article supplement (PMC11105687)
Supplement: 18_2019_3072_MOESM1_ESM.pdf [file 18_2019_3072_MOESM1_ESM.pdf]

## Supplementary material to

### A role for polycystin-1 and polycystin-2 in neural progenitor cell differentiation

Natalie Winokurow and Stefan Schumacher

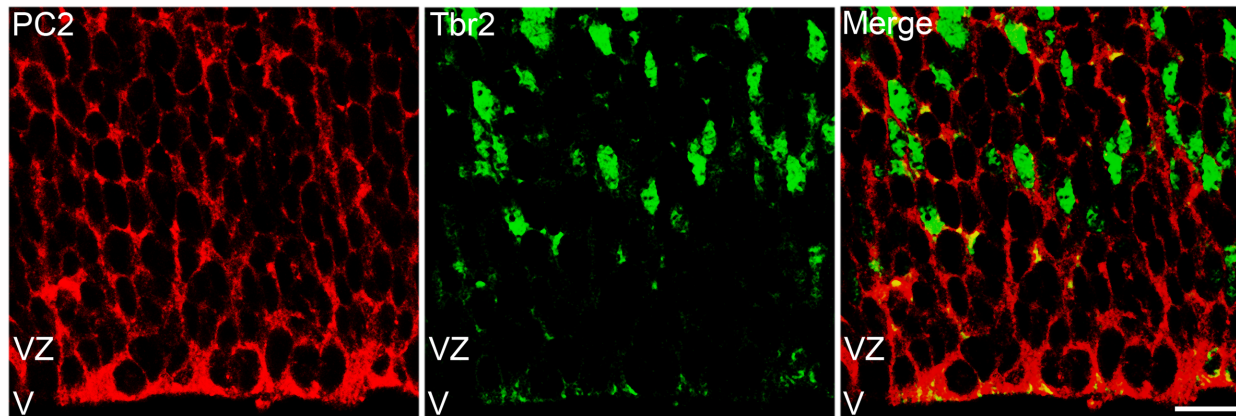

**Suppl. Fig. S1** PC2 can be detected in Tbr2-positive cells during neurogenesis. Coronal sections of E14.5 embryonic mouse brains were analyzed by indirect immunofluorescence staining with a monoclonal antibody to PC2 followed by a polyclonal antibody to Tbr2. A detail picture showing the VZ including the transition to the subventricular zone is shown. PC2 can be detected in Tbr2-positive cells. Scale bar, 15  $\mu\text{m}$ . V, ventricle; VZ, ventricular zone.

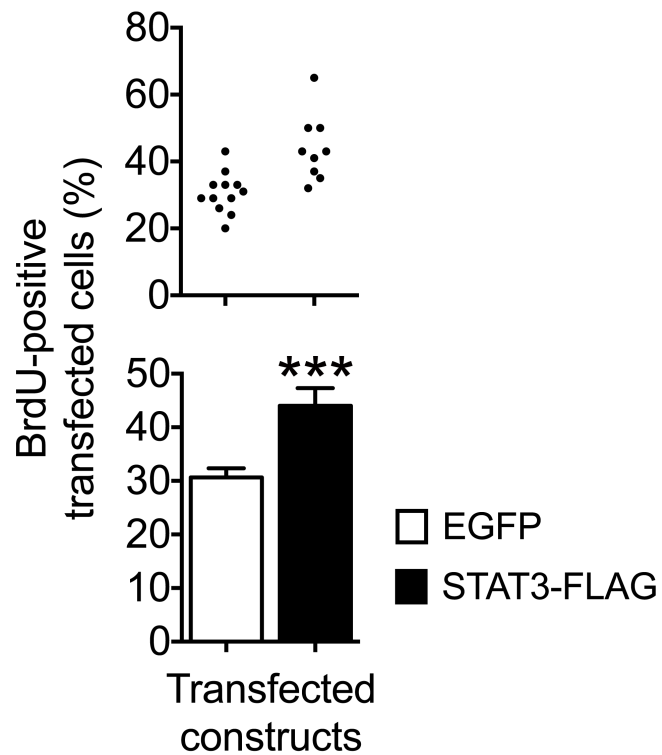

**Suppl. Fig. S2** STAT3 overexpression leads to an increase in the number of proliferating NPCs. Primary cells prepared from the neocortices of E13.5 mice were cultured in the presence of 20 ng/ml bFGF, transfected on days in vitro 1 (DIV1) with the indicated constructs, and subjected to BrdU labeling 3 days later (DIV4). The percentage of BrdU-positive transfected cells was assessed. Overexpression of STAT3-FLAG increases the percentage of BrdU-positive proliferating cells (to 144%) when compared to the EGFP control. Data are presented as means  $\pm$  SEM in a histogram (means are  $30.6 \pm 1.7$  for EGFP and  $44 \pm 3.3$  for STAT3-FLAG;  $***p < 0.005$ ; Mann-Whitney test; 3 replicates) and in a scatter plot (one dot represents the percentage of BrdU-positive transfected cells of a group of 100 analyzed transfected cells).

**Supplementary table 1**

| Figure | Experimental schedule                                                                                                                                                                                                                                                                                                                                                                            | Number of independent experiments (replicates) | Number of data points measured (number of cells analyzed, number of WB bands analyzed)                                                   | Parameter analyzed                                                                                                 | Statistical test                                                             |
|--------|--------------------------------------------------------------------------------------------------------------------------------------------------------------------------------------------------------------------------------------------------------------------------------------------------------------------------------------------------------------------------------------------------|------------------------------------------------|------------------------------------------------------------------------------------------------------------------------------------------|--------------------------------------------------------------------------------------------------------------------|------------------------------------------------------------------------------|
|        |                                                                                                                                                                                                                                                                                                                                                                                                  |                                                |                                                                                                                                          | Constructs: mean $\pm$ SEM                                                                                         |                                                                              |
| 2a     | Co-transfection of HEK 293 cells with the indicated (figure legend) constructs; analysis of expression of recombinant FLAG-PC1 in HEK 293 cells via SDS-PAGE and WB; equal total protein amounts were applied to the SDS-PAGE and WB for each experimental condition; the intensity of WB bands (anti FLAG immunoreactivity, normalized to anti $\beta$ -Actin immunoreactivity) was determined. | 3                                              | FLAG-PC1 + kdcontrol:<br>6 WB band pairs (FLAG-PC1/ $\beta$ -Actin)                                                                      | Signal intensity of WB bands (normalized)                                                                          | Kruskal-Wallis test followed by post-hoc multiple comparison analysis (Dunn) |
|        |                                                                                                                                                                                                                                                                                                                                                                                                  |                                                | FLAG-PC1 + Pkd1-kd1:<br>6 WB band pairs (FLAG-PC1/ $\beta$ -Actin)<br>FLAG-PC1 + Pkd1-kd2:<br>6 WB band pairs (FLAG-PC1/ $\beta$ -Actin) | FLAG-PC1 + kdcontrol: $0.74 \pm 0.1$<br>FLAG-PC1 + Pkd1-kd1: $0.24 \pm 0.1$<br>FLAG-PC1 + Pkd1-kd2: $0.3 \pm 0.1$  |                                                                              |
| 2a     | Co-transfection of HEK 293 cells with the indicated (figure legend) constructs; analysis of expression of recombinant MYC-PC2 in HEK 293 cells via SDS-PAGE and WB; equal total protein amounts were applied to the SDS-PAGE and WB for each experimental condition; the intensity of WB bands (anti FLAG immunoreactivity, normalized to anti $\beta$ -Actin immunoreactivity) was determined.  | 3                                              | MYC-PC2 + kdcontrol:<br>6 WB band pairs (MYC-PC2/ $\beta$ -Actin)                                                                        | Signal intensity of WB bands (normalized)                                                                          | Kruskal-Wallis test followed by post-hoc multiple comparison analysis (Dunn) |
|        |                                                                                                                                                                                                                                                                                                                                                                                                  |                                                | MYC-PC2 + Pkd2-kd1:<br>6 WB band pairs (MYC-PC2/ $\beta$ -Actin)                                                                         | MYC-PC2 + kdcontrol: $0.84 \pm 0.03$<br>MYC-PC2 + Pkd2-kd1: $0.51 \pm 0.05$                                        |                                                                              |
| 2b     | Co-transfection of cortical NPCs with the indicated (figure legend) constructs; analysis of expression of recombinant FLAG-PC1 via anti FLAG immunofluorescence analysis; the fluorescence background was subtracted.                                                                                                                                                                            | 3                                              | FLAG-PC1 + kdcontrol:<br>98 transfected cells analyzed                                                                                   | Relative fluorescence intensity (AU)                                                                               | Kruskal-Wallis test followed by post-hoc multiple comparison analysis (Dunn) |
|        |                                                                                                                                                                                                                                                                                                                                                                                                  |                                                | FLAG-PC1 + Pkd1-kd1:<br>103 transfected cells analyzed<br>FLAG-PC1 + Pkd1-kd2:<br>104 transfected cells analyzed                         | FLAG-PC1 + kdcontrol: $95.7 \pm 8.7$<br>FLAG-PC1 + Pkd1-kd1: $12.7 \pm 2.4$<br>FLAG-PC1 + Pkd1-kd2: $31.4 \pm 2.4$ |                                                                              |
| 2b     | Co-transfection of cortical NPCs with the indicated (figure legend) constructs; analysis of expression of recombinant FLAG-PC2/UTR via anti FLAG immunofluorescence analysis; the fluorescence background was subtracted.                                                                                                                                                                        | 3                                              | FLAG-PC2/UTR + kdcontrol:<br>156 transfected cells analyzed                                                                              | Relative fluorescence intensity (AU)                                                                               | Kruskal-Wallis test followed by post-hoc multiple comparison analysis (Dunn) |
|        |                                                                                                                                                                                                                                                                                                                                                                                                  |                                                | FLAG-PC2/UTR + Pkd1-kd1:<br>153 transfected cells analyzed<br>FLAG-PC2/UTR + Pkd1-kd2:                                                   | FLAG-PC2/UTR + kdcontrol: $80.0 \pm 8.8$                                                                           |                                                                              |

|    |                                                                                                                                                                                                                                                           |   |                                                                                                                                                                                                                                                                                                                                                                                                                                                                                                                                                                                                                                                                                                                                                                                         |                                                                                                                                                                                                                                                                 |                                                                              |
|----|-----------------------------------------------------------------------------------------------------------------------------------------------------------------------------------------------------------------------------------------------------------|---|-----------------------------------------------------------------------------------------------------------------------------------------------------------------------------------------------------------------------------------------------------------------------------------------------------------------------------------------------------------------------------------------------------------------------------------------------------------------------------------------------------------------------------------------------------------------------------------------------------------------------------------------------------------------------------------------------------------------------------------------------------------------------------------------|-----------------------------------------------------------------------------------------------------------------------------------------------------------------------------------------------------------------------------------------------------------------|------------------------------------------------------------------------------|
|    |                                                                                                                                                                                                                                                           |   | 155 transfected cells analyzed                                                                                                                                                                                                                                                                                                                                                                                                                                                                                                                                                                                                                                                                                                                                                          | FLAG-PC2/UTR + Pkd2-kd1:<br>23.6 ± 2.8<br>FLAG-PC2/UTR + Pkd2-kd2:<br>23.8 ± 4.6                                                                                                                                                                                | comparison analysis (Dunn)                                                   |
| 2d | Co-transfection of cortical NPCs with the indicated (figure legend) constructs; in addition, the constructs mPkd1-kd2 and mPkd2-kd2 were co-transfected; BrdU labeling 3 days after transfection; counting the number of BrdU-positive transfected cells. | 3 | kdcontrol:<br>9 coverslips with 4,200 transfected cells (42 groups of cells including 100 transfected cells each) analyzed<br>Pkd1-kd1:<br>8 coverslips with 2,400 transfected cells (24 groups of cells including 100 transfected cells each) analyzed<br>Pkd1-kd2:<br>9 coverslips with 4,200 transfected cells (42 groups of cells including 100 transfected cells each) analyzed<br>Pkd2-kd1:<br>6 coverslips with 2,700 transfected cells (27 groups of cells including 100 transfected cells each) analyzed<br>Pkd2-kd2:<br>10 coverslips with 4,500 transfected cells (45 groups of cells including 100 transfected cells each) analyzed<br>Pkd1-kd2 + Pkd2-kd2:<br>8 coverslips with 3,300 transfected cells (33 groups of cells including 100 transfected cells each) analyzed | BrdU-positive transfected cells (%)<br><br>kdcontrol + kdcontrol: 32.5 ± 1.5<br>Pkd1-kd1 + kdcontrol: 43.0 ± 2.5<br>Pkd1-kd2 + kdcontrol: 48.7 ± 2.1<br>Pkd2-kd1 + kdcontrol: 44.3 ± 1.8<br>Pkd2-kd2 + kdcontrol: 46.5 ± 1.5<br>Pkd1-kd2 + Pkd2-kd2: 48.0 ± 1.8 | Kruskal-Wallis test followed by post-hoc multiple comparison analysis (Dunn) |
| 2e | Transfection of cortical NPCs with the indicated (figure legend) constructs; immunostaining of cleaved caspase 3 on day 3 after transfection;                                                                                                             | 3 | kdcontrol:<br>10 coverslips with 9,200 transfected cells analyzed                                                                                                                                                                                                                                                                                                                                                                                                                                                                                                                                                                                                                                                                                                                       | Cleaved caspase 3-positive transfected cells (%)                                                                                                                                                                                                                | Kruskal-Wallis test followed by                                              |

|    |                                                                                                                                                                                              |   |                                                                                                                                                                                                                                                                                                                                                                                                     |                                                                                                                                                                                                                                                                          |                                                                              |
|----|----------------------------------------------------------------------------------------------------------------------------------------------------------------------------------------------|---|-----------------------------------------------------------------------------------------------------------------------------------------------------------------------------------------------------------------------------------------------------------------------------------------------------------------------------------------------------------------------------------------------------|--------------------------------------------------------------------------------------------------------------------------------------------------------------------------------------------------------------------------------------------------------------------------|------------------------------------------------------------------------------|
|    | counting the number of cleaved caspase 3-positive transfected cells.                                                                                                                         |   | <p>Pkd1-kd1:<br/>7 coverslips with 4,600 transfected cells analyzed</p> <p>Pkd1-kd2:<br/>7 coverslips with 5,900 transfected cells analyzed</p> <p>Pkd2-kd1:<br/>8 coverslips with 4,800 transfected cells analyzed</p> <p>Pkd2-kd2:<br/>7 coverslips with 4,300 transfected cells analyzed</p>                                                                                                     | <p>kdcontrol: <math>1.56 \pm 0.3</math></p> <p>Pkd1-kd1: <math>1.76 \pm 0.4</math></p> <p>Pkd1-kd2: <math>1.35 \pm 0.2</math></p> <p>Pkd2-kd1: <math>1.85 \pm 0.4</math></p> <p>Pkd2-kd2: <math>1.69 \pm 0.4</math></p>                                                  | post-hoc multiple comparison analysis (Dunn)                                 |
| 2g | Transfection of cortical NPCs with the indicated (figure legend) constructs; BrdU labeling 3 days after transfection; counting the number of BrdU-positive transfected cells.                | 3 | <p>EGFP:<br/>9 coverslips with 2,700 transfected cells (9 groups of cells including 300 transfected cells each) analyzed</p> <p>MYC-PC2:<br/>9 coverslips with 2,700 transfected cells (9 groups of cells including 300 transfected cells each) analyzed</p>                                                                                                                                        | <p>BrdU-positive transfected cells (%)</p> <hr/> <p>EGFP: <math>31.7 \pm 1.5</math></p> <p>MYC-PC2: <math>33.7 \pm 1.5</math></p>                                                                                                                                        | Kruskal-Wallis test followed by post-hoc multiple comparison analysis (Dunn) |
| 3b | Transfection of cortical NPCs with the indicated (figure legend) constructs; immunostaining of MAP2 on day 3 following transfection; counting the number of MAP2-positive transfected cells. | 4 | <p>kdcontrol:<br/>5 coverslips with 3,000 transfected cells (5 groups of cells including 600 transfected cells each) analyzed</p> <p>Pkd1-kd1:<br/>4 coverslips with 2,400 transfected cells (4 groups of cells including 600 transfected cells each) analyzed</p> <p>Pkd1-kd2:<br/>4 coverslips with 2,400 transfected cells (4 groups of cells including 600 transfected cells each) analyzed</p> | <p>MAP2-positive transfected cells (%)</p> <hr/> <p>kdcontrol: <math>54.7 \pm 1.8</math></p> <p>Pkd1-kd1: <math>35.0 \pm 2.9</math></p> <p>Pkd1-kd2: <math>35.8 \pm 2.3</math></p> <p>Pkd2-kd1: <math>35.9 \pm 2.2</math></p> <p>Pkd2-kd2: <math>37.6 \pm 2.4</math></p> | Kruskal-Wallis test followed by post-hoc multiple comparison analysis (Dunn) |

|    |                                                                                                                                                                                                                                                                                                             |   |                                                                                                                                                                                                                                                                      |                                                                                                                                                                                                                                                                                              |                                                                              |
|----|-------------------------------------------------------------------------------------------------------------------------------------------------------------------------------------------------------------------------------------------------------------------------------------------------------------|---|----------------------------------------------------------------------------------------------------------------------------------------------------------------------------------------------------------------------------------------------------------------------|----------------------------------------------------------------------------------------------------------------------------------------------------------------------------------------------------------------------------------------------------------------------------------------------|------------------------------------------------------------------------------|
|    |                                                                                                                                                                                                                                                                                                             |   | <p>Pkd2-kd1:<br/>5 coverslips with 3,000 transfected cells (5 groups of cells including 600 transfected cells each) analyzed</p> <p>Pkd2-kd2:<br/>6 coverslips with 3,600 transfected cells (6 groups of cells including 600 transfected cells each) analyzed</p>    |                                                                                                                                                                                                                                                                                              |                                                                              |
| 3d | Transfection of cortical NPCs with the indicated (figure legend) constructs; immunostaining of DsRed (derived from the expression of the T $\alpha$ 1p-DsRed2 sensor) on day 3 following transfection; assessment of the fluorescence derived from this sensor; the fluorescence background was subtracted. | 4 | <p>kdcontrol:<br/>198 transfected cells analyzed</p> <p>Pkd1-kd1:<br/>101 transfected cells analyzed</p> <p>Pkd1-kd2:<br/>101 transfected cells analyzed</p> <p>Pkd2-kd1:<br/>201 transfected cells analyzed</p> <p>Pkd2-kd2:<br/>254 transfected cells analyzed</p> | <p>T<math>\alpha</math> sensor fluorescence of transfected cells (AU)</p> <hr/> <p>kdcontrol: 1315 <math>\pm</math> 75.4<br/>Pkd1-kd1: 403 <math>\pm</math> 80.8<br/>Pkd1-kd2: 343 <math>\pm</math> 81.7<br/>Pkd2-kd1: 626 <math>\pm</math> 66.4<br/>Pkd2-kd2: 739 <math>\pm</math> 61.1</p> | Kruskal-Wallis test followed by post-hoc multiple comparison analysis (Dunn) |
| 4b | Transfection of cortical NPCs with the indicated (figure legend) constructs; immunostaining of GFP (derived from the expression of the CBFRE-EGFP sensor) on day 2 following transfection; assessment of the fluorescence derived from this sensor; the fluorescence background was subtracted.             | 3 | <p>kdcontrol:<br/>400 transfected cells analyzed</p> <p>Pkd1-kd1:<br/>338 transfected cells analyzed</p> <p>Pkd1-kd2:<br/>388 transfected cells analyzed</p> <p>Pkd2-kd1:<br/>388 transfected cells analyzed</p> <p>Pkd2-kd2:<br/>201 transfected cells analyzed</p> | <p>CBFRE sensor fluorescence of transfected cells (AU)</p> <hr/> <p>kdcontrol: 251 <math>\pm</math> 14.7<br/>Pkd1-kd1: 420 <math>\pm</math> 18.0<br/>Pkd1-kd2: 557 <math>\pm</math> 23.6<br/>Pkd2-kd1: 619 <math>\pm</math> 30.0<br/>Pkd2-kd2: 525 <math>\pm</math> 32.8</p>                 | Kruskal-Wallis test followed by post-hoc multiple comparison analysis (Dunn) |
| 5b | Transfection of cortical NPCs with the indicated (figure legend) constructs; immunostaining of nestin on day 3 following transfection; analysis of GFP <sup>+</sup> /Nestin <sup>+</sup> -positive clusters.                                                                                                | 3 | <p>kdcontrol:<br/>8 coverslips with 945 clusters (27 groups of 35 clusters each) analyzed</p> <p>Pkd1-kd1:<br/>8 coverslips with 665 clusters (19 groups of 35 clusters each) analyzed</p>                                                                           | <p>Number of GFP<sup>+</sup>/Nestin<sup>+</sup>-positive clusters (%)</p> <hr/> <p>kdcontrol: 57.9 <math>\pm</math> 2.9<br/>Pkd1-kd1: 77.1 <math>\pm</math> 2.3<br/>Pkd1-kd2: 80.0 <math>\pm</math> 1.6<br/>Pkd2-kd1: 71.2 <math>\pm</math> 1.7<br/>Pkd2-kd2: 73.6 <math>\pm</math> 1.7</p>  | Kruskal-Wallis test followed by post-hoc multiple comparison analysis (Dunn) |

|    |                                                                                                                                                                                                                                                                                                                                                    |   |                                                                                                                                                                                                                                                                                                                                                                                                                                                                                   |                                                                                                                                                                      |                                                                              |
|----|----------------------------------------------------------------------------------------------------------------------------------------------------------------------------------------------------------------------------------------------------------------------------------------------------------------------------------------------------|---|-----------------------------------------------------------------------------------------------------------------------------------------------------------------------------------------------------------------------------------------------------------------------------------------------------------------------------------------------------------------------------------------------------------------------------------------------------------------------------------|----------------------------------------------------------------------------------------------------------------------------------------------------------------------|------------------------------------------------------------------------------|
|    |                                                                                                                                                                                                                                                                                                                                                    |   | <p>Pkd1-kd2:<br/>8 coverslips with 735 clusters (21 groups of 35 clusters each) analyzed</p> <p>Pkd2-kd1:<br/>8 coverslips with 735 clusters (21 groups of 35 clusters each) analyzed</p> <p>Pkd2-kd2:<br/>8 coverslips with 770 clusters (22 groups of 35 clusters each) analyzed</p>                                                                                                                                                                                            |                                                                                                                                                                      |                                                                              |
| 5c | Transfection of cortical NPCs with the indicated (figure legend) constructs; immunostaining of nestin on day 3 following transfection; analysis of mixed clusters comprising GFP <sup>+</sup> /Nestin <sup>+</sup> -positive and GFP <sup>+</sup> -positive but Nestin <sup>-</sup> -negative cells.                                               | 3 | <p>kdcontrol:<br/>8 coverslips with 945 clusters (27 groups of 35 clusters each) analyzed</p> <p>Pkd1-kd1:<br/>8 coverslips with 665 clusters (19 groups of 35 clusters each) analyzed</p> <p>Pkd1-kd2:<br/>8 coverslips with 735 clusters (21 groups of 35 clusters each) analyzed</p> <p>Pkd2-kd1:<br/>8 coverslips with 735 clusters (21 groups of 35 clusters each) analyzed</p> <p>Pkd2-kd2:<br/>8 coverslips with 770 clusters (22 groups of 35 clusters each) analyzed</p> | <p>Number of mixed clusters (%)</p> <p>kdcontrol: 36.4 ± 2.6<br/>Pkd1-kd1: 18.0 ± 1.8<br/>Pkd1-kd2: 15.4 ± 1.4<br/>Pkd2-kd1: 21.6 ± 1.4<br/>Pkd2-kd2: 21.5 ± 1.8</p> | Kruskal-Wallis test followed by post-hoc multiple comparison analysis (Dunn) |
| 5e | Co-transfection of cortical NPCs with the indicated (figure legend) constructs; the BrdU labeling was performed on day 2 after transfection; a triple immunostaining of RFP (driven by the polycystin shRNA constructs), GFP (driven by the CBFRE-EGFP sensor construct), and BrdU was performed on day 3 following transfection. Cell pairs to be | 3 | <p>kdcontrol: 65 cell pairs analyzed</p> <p>Pkd1-kd2: 38 cell pairs analyzed</p> <p>Pkd2-kd2: 28 cell pairs analyzed</p>                                                                                                                                                                                                                                                                                                                                                          | <p>Ratio of CBFRE sensor (GFP) fluorescence in cell pairs</p> <p>kdcontrol: 1.2 ± 0.03<br/>Pkd1-kd2: 1.1 ± 0.03<br/>Pkd2-kd2: 1.1 ± 0.02</p>                         | Kruskal-Wallis test followed by post-hoc multiple comparison                 |

|    |                                                                                                                                                                                  |   |                                                                                                                                                                                                                                                                                                                                                                                                                        |                                                                                                                                                     |                                                                              |
|----|----------------------------------------------------------------------------------------------------------------------------------------------------------------------------------|---|------------------------------------------------------------------------------------------------------------------------------------------------------------------------------------------------------------------------------------------------------------------------------------------------------------------------------------------------------------------------------------------------------------------------|-----------------------------------------------------------------------------------------------------------------------------------------------------|------------------------------------------------------------------------------|
|    | analyzed were selected according to the criteria specified in <i>Materials and methods</i> .                                                                                     |   |                                                                                                                                                                                                                                                                                                                                                                                                                        |                                                                                                                                                     | analysis (Dunn)                                                              |
| 6d | Co-transfection of cortical NPCs with the indicated (figure legend) constructs; BrdU labeling 3 days after transfection; counting the number of BrdU-positive transfected cells. | 5 | kdcontrol:<br>9 coverslips with 3,600 transfected cells (12 groups of cells including 300 transfected cells each) analyzed<br>kdcontrol + STAT3-kd1:<br>9 coverslips with 4,500 transfected cells (15 groups of cells including 300 transfected cells each) analyzed<br>kdcontrol + STAT3-kd2:<br>9 coverslips with 2,700 transfected cells (9 groups of cells including 300 transfected cells each) analyzed          | BrdU-positive transfected cells (%)<br><br>kdcontrol: 23.5 ± 1.7<br>kdcontrol + STAT3-kd1: 15.8 ± 1.6<br>kdcontrol + STAT3-kd2: 15.0 ± 2.2          | Kruskal-Wallis test followed by post-hoc multiple comparison analysis (Dunn) |
| 6e | Co-transfection of cortical NPCs with the indicated (figure legend) constructs; BrdU labeling 3 days after transfection; counting the number of BrdU-positive transfected cells. | 5 | Pkd1-kd2 + kdcontrol:<br>9 coverslips with 4,200 transfected cells (14 groups of cells including 300 transfected cells each) analyzed<br>Pkd1-kd2 + STAT3-kd1:<br>9 coverslips with 4,500 transfected cells (15 groups of cells including 300 transfected cells each) analyzed<br>Pkd1-kd2 + STAT3-kd2:<br>9 coverslips with 2,700 transfected cells (9 groups of cells including 300 transfected cells each) analyzed | BrdU-positive transfected cells (%)<br><br>Pkd1-kd2 + kdcontrol: 28.4 ± 2.0<br>Pkd1-kd2 + STAT3-kd1: 20.8 ± 2.0<br>Pkd1-kd2 + STAT3-kd2: 18.5 ± 2.8 | Kruskal-Wallis test followed by post-hoc multiple comparison analysis (Dunn) |
| 6f | Co-transfection of cortical NPCs with the indicated (figure legend) constructs; BrdU labeling 3 days after transfection; counting the number of BrdU-positive transfected cells. | 5 | Pkd2-kd2 + kdcontrol:<br>9 coverslips with 3,000 transfected cells (10 groups of                                                                                                                                                                                                                                                                                                                                       | BrdU-positive transfected cells (%)                                                                                                                 | Kruskal-Wallis test followed by                                              |



|    |                                                                                                                                                                                                                                                                |   |                                                                                                                                                                                                                                                                                                                                                                                                                                                                                                                                                                   |                                                                                                                                                                                                                                                    |                                                     |
|----|----------------------------------------------------------------------------------------------------------------------------------------------------------------------------------------------------------------------------------------------------------------|---|-------------------------------------------------------------------------------------------------------------------------------------------------------------------------------------------------------------------------------------------------------------------------------------------------------------------------------------------------------------------------------------------------------------------------------------------------------------------------------------------------------------------------------------------------------------------|----------------------------------------------------------------------------------------------------------------------------------------------------------------------------------------------------------------------------------------------------|-----------------------------------------------------|
|    |                                                                                                                                                                                                                                                                |   | <p>cells including 300 transfected cells each) analyzed<br/> Pkd2-kd2 + STAT3-kd1:<br/> 9 coverslips with 4,200 transfected cells (14 groups of cells including 300 transfected cells each) analyzed<br/> Pkd2-kd2 + STAT3-kd2:<br/> 9 coverslips with 3,000 transfected cells (10 groups of cells including 300 transfected cells each) analyzed</p>                                                                                                                                                                                                             | <p>Pkd2-kd2 + kdcontrol: <math>28.5 \pm 2.2</math><br/> Pkd2-kd2 + STAT3-kd1: <math>17.3 \pm 2.3</math><br/> Pkd2-kd2 + STAT3-kd2: <math>18.5 \pm 2.0</math></p>                                                                                   | <p>post-hoc multiple comparison analysis (Dunn)</p> |
| 7b | <p>Transfection of cortical NPCs with the indicated (figure legend) constructs; addition of the STAT3 inhibitor S3I-201 (or DMSO) on day 2 after plating. BrdU labeling 3 days after transfection; counting the number of BrdU-positive transfected cells.</p> | 4 | <p>kdcontrol + DMSO:<br/> 8 coverslips with 4,800 transfected cells (16 groups of cells including 300 transfected cells each) analyzed<br/> kdcontrol + S3I:<br/> 8 coverslips with 4,800 transfected cells (16 groups of cells including 300 transfected cells each) analyzed<br/> Pkd1-kd2 + DMSO:<br/> 8 coverslips with 5,100 transfected cells (17 groups of cells including 300 transfected cells each) analyzed<br/> Pkd1-kd2 + S3I:<br/> 8 coverslips with 5,400 transfected cells (18 groups of cells including 300 transfected cells each) analyzed</p> | <p>BrdU-positive transfected cells (%)</p> <hr/> <p>kdcontrol + DMSO: <math>20.2 \pm 1.2</math><br/> kdcontrol + S3I: <math>15.2 \pm 1.2</math><br/> Pkd1-kd2 + DMSO: <math>24.4 \pm 1.2</math><br/> Pkd1-kd2 + S3I: <math>16.0 \pm 1.0</math></p> | <p>Mann-Whitney test</p>                            |
